# Supplementary material for: Epidemiological Study of Uveal Melanoma from US Surveillance, Epidemiology, and End Results Program (2010–2015)
Source: Hindawi journal article supplement (doi:10.1155/2020/3614039), 2020-02-19
Supplement: f1 [file 3614039.f1.pdf]

**A**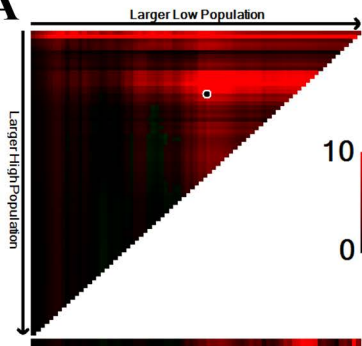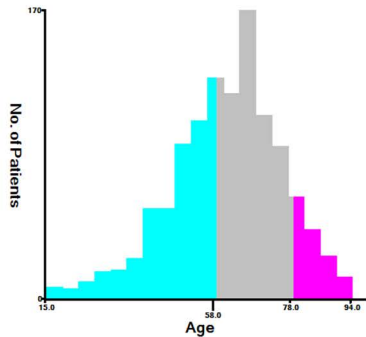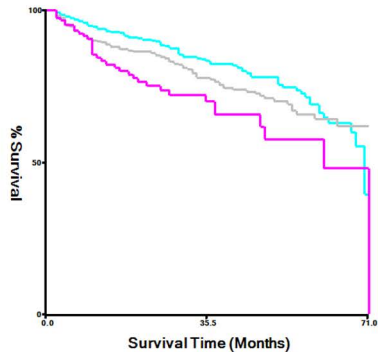**Overall Survival****B**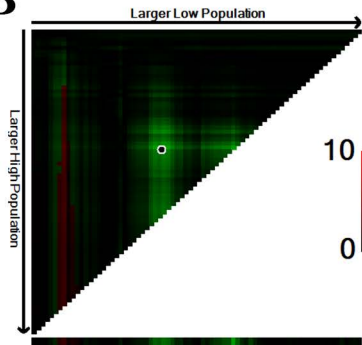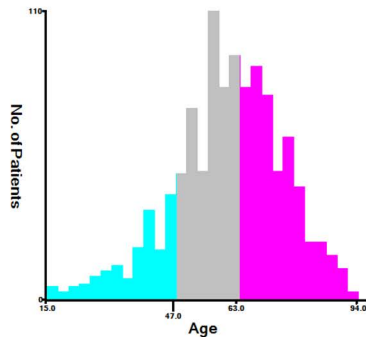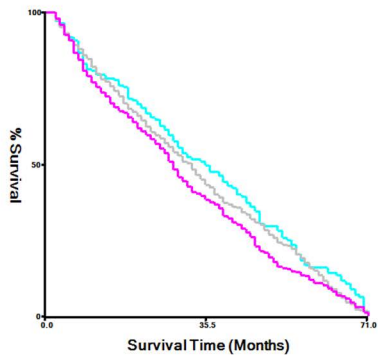**Disease Specific Survival**

Table S1. Uveal melanoma Age-adjusted Incidence Rates and IRRs from the SEER 18 Registries Research Database, 2010–2015 (2631 cases included)

| Characteristic            | No of Patients <sup>a</sup> | Percentage <sup>b</sup> , % | Incidence Rate (95% CI) | IRR (95% CI)               |
|---------------------------|-----------------------------|-----------------------------|-------------------------|----------------------------|
| <b>Total</b>              | 2631                        | 100                         | 4.637 (4.458-4.821)     | N/A                        |
| <b>Sex</b>                |                             |                             |                         |                            |
| Male                      | 1405                        | 53.4                        | 5.306 (5.025-5.985)     | Reference                  |
| Female                    | 1226                        | 46.6                        | 4.076 (3.847-4.316)     | <b>0.768 (0.710-0.832)</b> |
| <b>Age Range</b>          |                             |                             |                         |                            |
| < 60                      | 1109                        | 42.2                        | 2.347 (2.209-2.492)     | Reference                  |
| 60-80                     | 1288                        | 49.0                        | 16.569 (15.656-17.520)  | <b>7.060 (6.498-7.669)</b> |
| > 80                      | 234                         | 8.9                         | 14.537 (12.728-16.535)  | <b>6.194 (5.351-7.146)</b> |
| <b>Race</b>               |                             |                             |                         |                            |
| White                     | 2533                        | 96.3                        | 5.712 (5.487-5.944)     | Reference                  |
| Black                     | 25                          | 1.0                         | 0.435 (0.276-0.648)     | <b>0.076 (0.048-0.114)</b> |
| AIAN                      | 7                           | 0.2                         | 0.934 (0.350-1.998)     | <b>0.164 (0.061-0.350)</b> |
| API                       | 32                          | 1.2                         | 0.557 (0.378-0.793)     | <b>0.098 (0.066-0.139)</b> |
| <b>Origin</b>             |                             |                             |                         |                            |
| Non-Hispanic              | 2482                        | 94.3                        | 5.135 (4.930-5.347)     | Reference                  |
| Hispanic                  | 147                         | 5.6                         | 1.795 (1.502-2.126)     | <b>0.350 (0.291-0.416)</b> |
| <b>Primary Laterality</b> |                             |                             |                         |                            |
| Right                     | 1283                        | 48.8                        | 2.260 (2.136-2.390)     | Reference                  |
| Left                      | 1340                        | 50.9                        | 2.361 (2.234-2.494)     | 1.045 (0.966-1.131)        |

Abbreviation: SEER, Surveillance, Epidemiology, and End Results; IRR, Incidence rate ratio; AIAN, American Indian/Alaska Native; API, Asian or Pacific Islander;

<sup>a</sup> Total amount may not be 2631 due to removing cases with unknown information.

<sup>b</sup> Percentages may not total 100% because of rounding and removing cases with unknown information.

Bold letter indicates that measurements are statistically significant compared to references ( $p < 0.05$ ).

Table S2. Demographics and Tumor Characteristics of 1,142 Patients from the SEER 18 Registries Research Database, 2010–2015

| <b>Characteristic</b>        | <b>No. of Patients</b> | <b>Value<sup>a</sup></b> |
|------------------------------|------------------------|--------------------------|
| <b>Sex, %</b>                |                        |                          |
| Female                       | 512                    | 44.8                     |
| Male                         | 630                    | 55.2                     |
| <b>Age, y</b>                |                        |                          |
| Mean (SD)                    |                        | 61.5 (14.3)              |
| Median (range)               |                        | 63 (15-94)               |
| <b>Age Range, %</b>          |                        |                          |
| < 60                         | 490                    | 42.9                     |
| 60-80                        | 560                    | 49.0                     |
| > 80                         | 92                     | 8.1                      |
| <b>Race, %</b>               |                        |                          |
| White                        | 1091                   | 95.5                     |
| Black                        | 17                     | 1.5                      |
| Others                       | 21                     | 1.8                      |
| Unknown                      | 13                     | 1.1                      |
| <b>Origin, %</b>             |                        |                          |
| Hispanic                     | 66                     | 5.8                      |
| Non-Hispanic                 | 1076                   | 94.2                     |
| <b>Primary Laterality, %</b> |                        |                          |
| Right                        | 553                    | 48.4                     |
| Left                         | 586                    | 51.3                     |
| Pair                         | 2                      | 0.2                      |
| Unknown                      | 1                      | 0.1                      |
| <b>Marital Status, %</b>     |                        |                          |
| Single (Never Married)       | 185                    | 16.2                     |
| Married                      | 660                    | 57.8                     |
| Divorced                     | 85                     | 7.4                      |
| Widowed                      | 104                    | 9.1                      |
| Separated                    | 9                      | 0.8                      |
| Unknown                      | 99                     | 8.7                      |
| <b>Summary Stage, %</b>      |                        |                          |
| Localized                    | 968                    | 84.8                     |
| Regional                     | 72                     | 6.3                      |
| Distant                      | 26                     | 2.3                      |
| Unknown                      | 76                     | 6.7                      |
| <b>AJCC Stage, %</b>         |                        |                          |
| I                            | 173                    | 15.1                     |
| II                           | 437                    | 38.3                     |
| III                          | 221                    | 19.4                     |
| IV                           | 27                     | 2.4                      |
| Unknown                      | 284                    | 24.9                     |

|                                   |      |      |
|-----------------------------------|------|------|
| <b>Metastasis at Diagnosis, %</b> |      |      |
| None                              | 1086 | 95.1 |
| Distant                           | 26   | 2.3  |
| Unknown                           | 30   | 2.6  |
| <b>Surgery, %</b>                 |      |      |
| Performed                         | 488  | 42.7 |
| Not Performed                     | 654  | 57.3 |
| <b>Radiation Subtype, %</b>       |      |      |
| Beam Radiation                    | 197  | 17.3 |
| Radioactive Implants              | 362  | 31.7 |
| Radioisotopes                     | 127  | 11.1 |
| Beam with Implants or Isotopes    | 5    | 0.4  |
| None/Unknown                      | 451  | 47.4 |
| <b>Chemotherapy, %</b>            |      |      |
| Performed                         | 30   | 2.6  |
| Not Performed                     | 1112 | 97.4 |

Abbreviation: SEER, Surveillance, Epidemiology, and End Results; AJCC, American Joint Committee on Cancer.

<sup>a</sup> Percentages may not total 100% because of rounding.
